# Supplementary material for: Trifluoromethyl derivatives of pentagon-fused C60: 1809C60(CF3)n (n = 10, 12, 14, 16)
Source: Royal Society of Chemistry journal article supplement (doi:10.1039/d1dt00493j), 2021-01-01
Supplement: d1dt00493j1.pdf [file d1dt00493j1.pdf]

## Supporting Information

### Synthesis and isolation of trifluoromethylation products

Ca. 45 mg of  $C_{60}$  (99.98%, TermUSA) were placed into a thick-walled glass ampoule and ca. 0.4 mL  $SbCl_5$  was added. The ampoule was cooled with liquid nitrogen, evacuated, sealed off, and heated at 440 °C for 5 d. After cooling and opening the ampoule, the reaction product was heated at 150 °C in vacuum for 1 h to remove excess of  $SbCl_5$  and  $SbCl_3$ . The chlorination product was trifluoromethylated with gaseous  $CF_3I$  in a quartz ampoule placed into in a tube gradient furnace at 450 °C for 3 h. The ampoule section with liquid  $CF_3I$  was kept outside the furnace at room temperature, thus producing a  $CF_3I$  gas pressure of ca. 6 bar. Trifluoromethylation products were sublimed into the less heated zone of the ampoule and deposited on the walls, forming an orange-coloured layer. The sublimate was dissolved in *n*-hexane and analyzed by MALDI TOF mass spectrometry, revealing the presence of  $C_{60}(CF_3)_n$  compounds with *n* ranging from 10 to 18 and small amounts of  $C_{60}(CF_3)_nF$  (*n* = 13 and 15), which are derivatives of non-IPR  $C_{60}^{S1}$  (Figure S1).

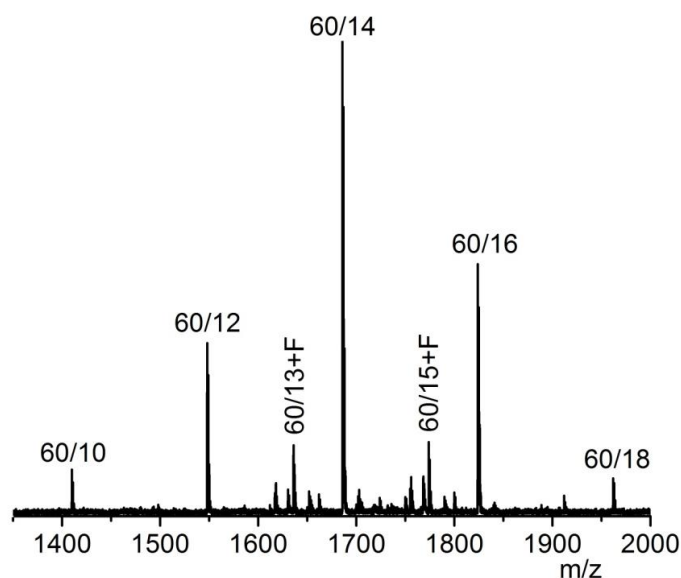

**Figure S1.** MALDI TOF mass spectrum of the trifluoromethylation product. Peak compositions  $C_{60}(CF_3)_n$  and  $C_{60}(CF_3)_nF$  are denoted as 60/*n* and 60/*n*+F, respectively.

The collected trifluoromethylation products were dissolved in *n*-hexane and subjected to HPLC separation in *n*-hexane using a semipreparative Cosmosil Buckyrep column (10 mm i.d. × 250 mm, Nacalai Tesque Inc.) (Figure S2) at a flow rate 3.5 mL min<sup>-1</sup>. In the second HPLC step, several fractions of the first step were subjected to further HPLC separation in *n*-hexane using a semipreparative Cosmosil Buckyrep D column (10 mm i.d. × 250 mm, Nacalai Tesque Inc.), resulting in subfractions of much better purity. The HPLC traces and spectrometric data for three subfractions are given in Figures S3 – S5). Note that subfraction p8p2 ( $C_{60}(CF_3)_{14}$ ) gave a mass spectrum which contains the main peak of  $C_{60}(CF_3)_{13}$  (Figure S4). In fact, this phenomenon is known for  $CF_3$  derivatives, featuring the presence of the addition motif of SPP (skewed-pentagonal pyramid), which results in an exceptionally easy detachment of one  $CF_3$  group from a fullerene( $CF_3$ )<sub>*n*</sub> molecule due to formation of anionic cyclopentadienyl structure.<sup>S2,3</sup> The presence of the SPP motif in the addition pattern of can be seen in Figure S6.

Several subfractions of the second HPLC step gave small yellow- or orange-coloured crystals after slow evaporation of *n*-hexane or recrystallization from toluene. An X-ray diffraction study with the use of synchrotron radiation revealed the crystal and molecular structures of three  $CF_3$  derivatives  $^{1809}C_{60}(CF_3)_n$  (*n* = 12, 14, and 16).

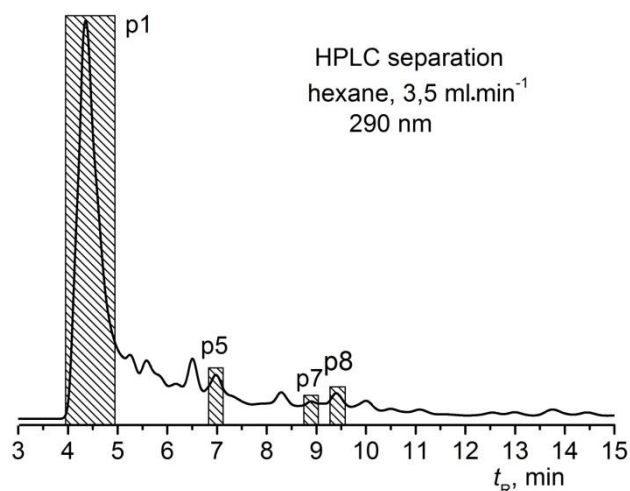

**Figure S2.** HPLC separation of the trifluoromethylation products (Cosmosil Buckyprep, 10 mm i.d.  $\times$  250 mm, *n*-hexane, 3.5 mL  $\cdot$  min $^{-1}$ ; 290 nm). The fractions denoted as pN were further separated using another column.

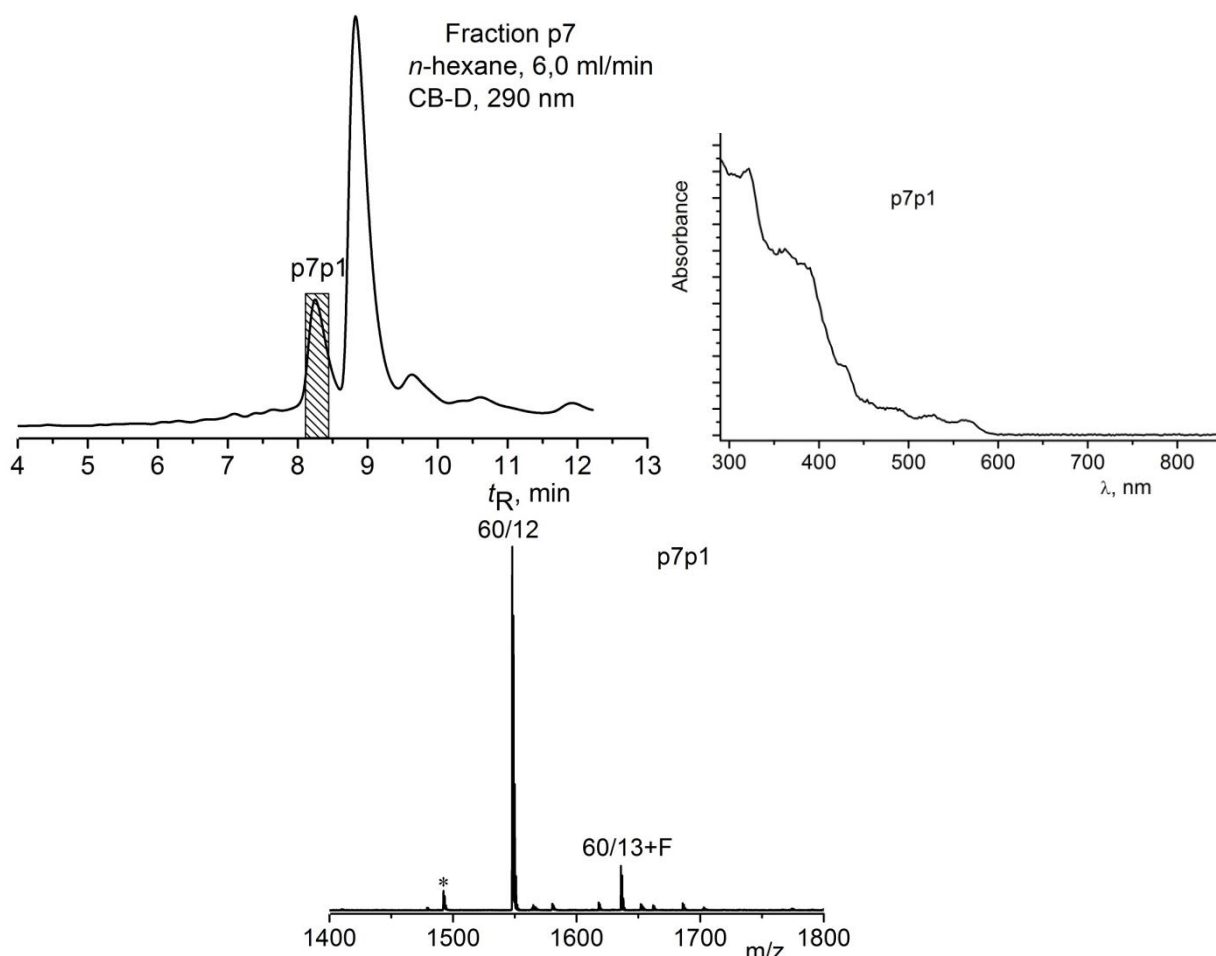

**Figure S3.** HPLC separation of fraction p7 on a Buckyprep D column and UV/Vis absorption spectrum of subfraction p7p1 (top panels). MALDI TOF mass spectrum shows a relatively good purity of  $C_{60}(CF_3)_{12}$ . The asterisk indicates a metastable peak.

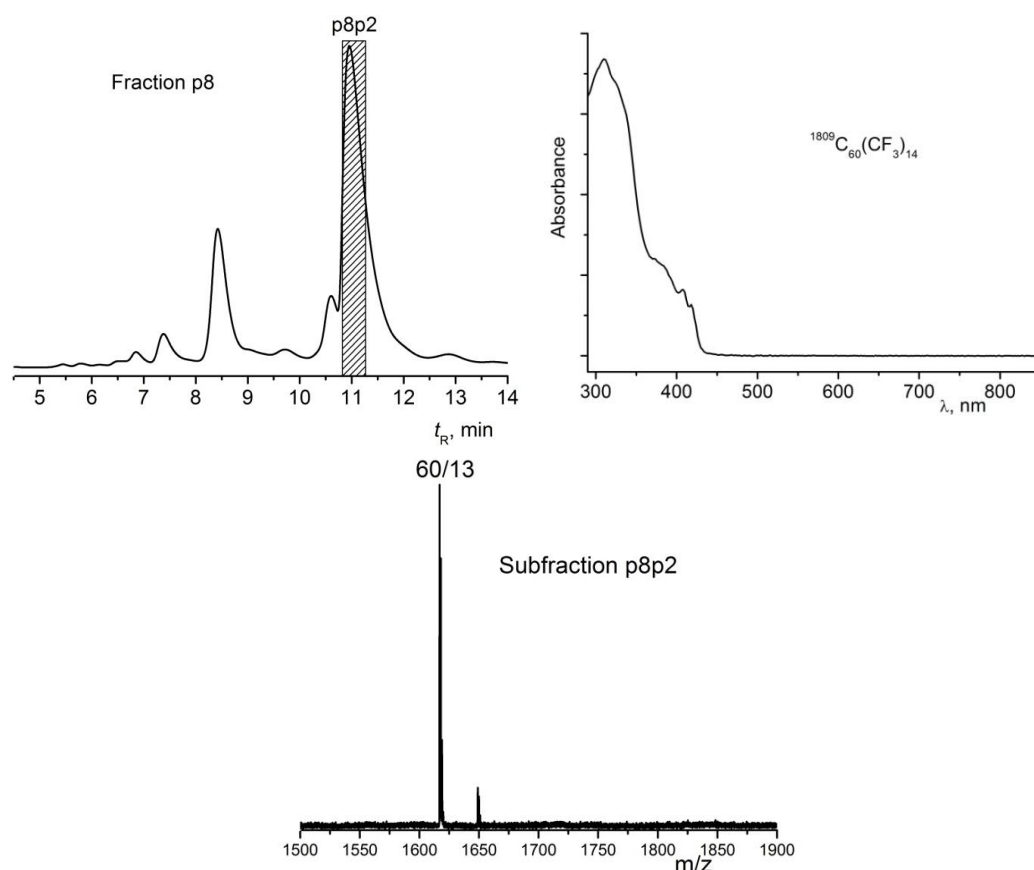

**Figure S4.** HPLC separation of fraction p8 on a Buckyrep D column and UV/Vis absorption spectrum of subfraction p8p2 (top panels). MALDI TOF mass spectrum with the prevailing peak of  $C_{60}(CF_3)_{13}$  (denoted as 60/13) shows a good purity of  $C_{60}(CF_3)_{14}$ . This mass spectrum should replace the spectrum of  $^{1809}C_{60}(CF_3)_{14}$  erroneously given in ref. S1. A small peak at 1649 mu corresponds to an admixture of  $C_{60}(CF_3)_{14}$  dioxide.

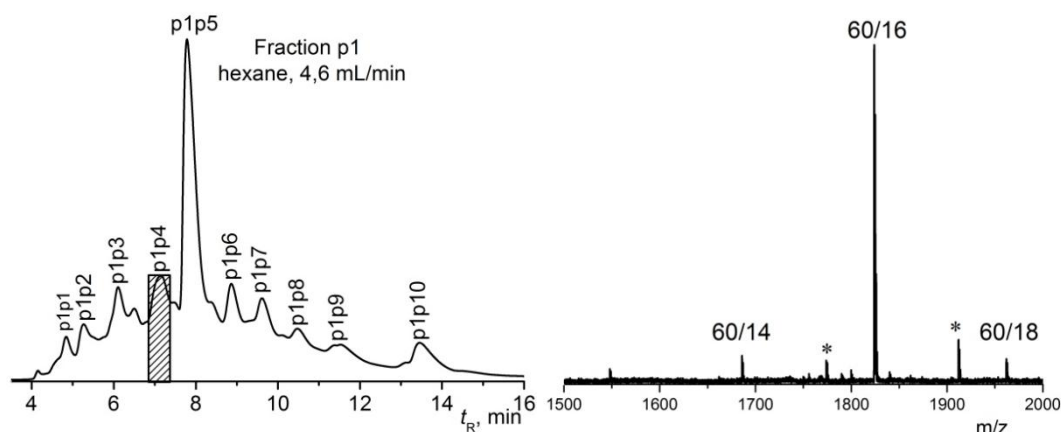

**Figure S5.** HPLC separation of fraction p1 on a Buckyrep D column and MALDI TOF mass spectrum with the prevailing peak of  $C_{1-C_{60}}(CF_3)_{16}$  (denoted as 60/16) demonstrating its relatively good purity. The asterisks indicate metastable peaks.

Note that nearly all (p1p1-p1p9) subfractions shown in Figure S5 (left) contained  $C_{60}(CF_3)_{16}$  according to MALDI TOF analyses. It can be supposed that the hypothetical  $C_s-C_{60}(CF_3)_{16}$  isomer (which is alternative to the experimental one) is probably present in the trifluoromethylation product but it was not isolated by HPLC in pure form.

### X-ray crystallography

Synchrotron X-ray data were collected at 100 K on BL14.2 at the BESSY storage ring (Berlin, Germany) using a PILATUS 3S 2M pixel detector ( $\lambda = 0.8266 \text{ \AA}$ ). All structures were solved and anisotropically refined using the SHELX package. Selected crystallographic data, some details of data collection and refinement, and CCDC deposition numbers are given in Table S1.

**Table S1.** Selected crystallographic data and some details of data collection and refinement.

| Compound                                              | $^{1809}\text{C}_{60}(\text{CF}_3)_{12}$ | $^{1809}\text{C}_{60}(\text{CF}_3)_{14}$ * | $^{1809}\text{C}_{60}(\text{CF}_3)_{16}$ |
|-------------------------------------------------------|------------------------------------------|--------------------------------------------|------------------------------------------|
| Solvate molecule                                      | PhMe                                     | -                                          | 0.5 PhMe                                 |
| $M_r$                                                 | 1640.85                                  | 1686.74                                    | 1870.83                                  |
| crystal system                                        | monoclinic                               | orthorhombic                               | triclinic                                |
| space group                                           | $P2_1/c$                                 | $Pbca$                                     | $P\bar{1}$                               |
| $a$ [ $\text{\AA}$ ]                                  | 18.161(1)                                | 20.135(1)                                  | 12.484(1)                                |
| $b$ [ $\text{\AA}$ ]                                  | 12.380(1)                                | 20.793(1)                                  | 13.298(1)                                |
| $c$ [ $\text{\AA}$ ]                                  | 24.509(2)                                | 25.050(2)                                  | 20.898(2)                                |
| $\alpha$ [ $^\circ$ ]                                 | 90                                       | 90                                         | 102.01(1)                                |
| $\beta$ [ $^\circ$ ]                                  | 97.87(1)                                 | 90                                         | 90.67(1)                                 |
| $\gamma$ [ $^\circ$ ]                                 | 90                                       | 90                                         | 115.74(1)                                |
| $V$ [ $\text{\AA}^3$ ]                                | 5480.8(7)                                | 10487.6(11)                                | 3036.1(5)                                |
| $Z$                                                   | 4                                        | 8                                          | 2                                        |
| $D_c$ [ $\text{g cm}^{-3}$ ]                          | 1.989                                    | 2.137                                      | 2.046                                    |
| refls collected / $R_{\text{int}}$                    | 62085 / 0.189                            | 158751 / 0.069                             | 44837 / 0.093                            |
| data / parameters                                     | 12528 / 1025                             | 15750 / 1050                               | 14194 / 1154                             |
| $R_1(I \geq 2\sigma(I)) / wR_2(\text{all})$           | 0.115 / 0.273                            | 0.073 / 0.186                              | 0.082 / 0.212                            |
| $\Delta\rho_{\text{max/min}}$ [ $\text{e \AA}^{-3}$ ] | 0.79 / -0.49                             | 0.91 / -0.44                               | 0.59 / -0.49                             |
| CCDC                                                  | 2061354                                  | 2061355                                    | 2061356                                  |

\* The former structure determination of this compound (CCDC 1828801) was performed with much lower accuracy.

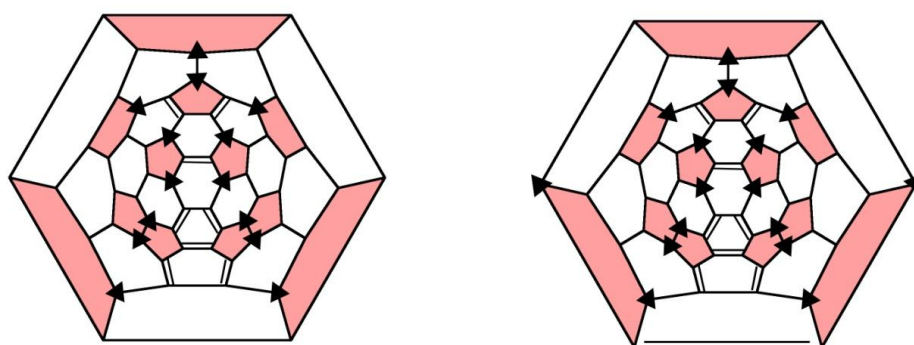

**Figure S6.** Schlegel diagrams of  $C_s$ - $^{1809}\text{C}_{60}(\text{CF}_3)_{14}$  and hypothetical  $C_s$ - $^{1809}\text{C}_{60}(\text{CF}_3)_{16}$  given parallel to the molecular mirror planes.

### Quantum-chemical calculations

Formation energies of isomers  $\text{C}_{60}\text{Cl}_n$  were calculated at the level of density functional theory (DFT) with the PBE exchange–correlation functional<sup>S4</sup> and the TZ2P-quality basis set<sup>S5</sup> implemented in the quantum-chemical PRIRODA package.<sup>S6</sup> The calculated values of HOMO-LUMO gaps demonstrate relatively high kinetic stabilities of  $^{1809}\text{C}_{60}(\text{CF}_3)_n$  derivatives (in eV): 1.81 ( $^{1809}\text{C}_{60}(\text{CF}_3)_{10}$ ), 1.45 ( $^{1809}\text{C}_{60}(\text{CF}_3)_{12}$ ), 2.18 ( $^{1809}\text{C}_{60}(\text{CF}_3)_{14}$ ), 1.99 (expt.  $C_{1-}^{1809}\text{C}_{60}(\text{CF}_3)_{16}$ ), and 1.77 (hypot.  $C_s$ - $^{1809}\text{C}_{60}(\text{CF}_3)_{16}$ ).

## Cartesian coordinates DFT optimized molecules

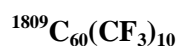

Atomic Coordinates:

| Atom | x           | y           | z           |
|------|-------------|-------------|-------------|
| C    | 1.93735362  | 2.77371380  | 1.80533466  |
| C    | 2.40550449  | 1.58805293  | 2.33937679  |
| C    | 1.52496973  | 0.77912117  | 3.13872650  |
| C    | 0.23008316  | 1.20537017  | 3.46455997  |
| C    | -0.25730675 | 2.43680843  | 2.90762142  |
| C    | 0.57893239  | 3.17420667  | 2.05876789  |
| C    | 2.38463048  | 3.32264019  | 0.43241081  |
| C    | 2.98980215  | 2.20144962  | -0.38039382 |
| C    | 3.45451705  | 1.01722760  | 0.15196714  |
| C    | 3.42802397  | 0.67698291  | 1.62376307  |
| C    | 2.75704494  | -0.69957212 | 1.81100885  |
| C    | 1.74145987  | -0.61270841 | 2.79043364  |
| C    | 0.65643777  | -1.51107419 | 2.75784387  |
| C    | -0.66631784 | -1.07682312 | 3.12440977  |
| C    | -0.87707556 | 0.26095531  | 3.48891870  |
| C    | -2.04539556 | 0.92668046  | 2.98527509  |
| C    | -1.66544904 | 2.25272491  | 2.58573515  |
| C    | -2.18499625 | 2.76592415  | 1.38705683  |
| C    | -1.32131154 | 3.49955677  | 0.49930171  |
| C    | 0.02876778  | 3.72647601  | 0.83493544  |
| C    | 1.01851572  | 3.70541840  | -0.17415177 |
| C    | 0.64084578  | 3.37835070  | -1.46798064 |
| C    | 1.46960591  | 2.52656336  | -2.31051705 |
| C    | 2.63304551  | 1.97068645  | -1.77800306 |
| C    | 2.93785714  | 0.60739675  | -2.09239142 |
| C    | 3.40796917  | -0.00833957 | -0.88812043 |
| C    | 2.97423591  | -1.30091938 | -0.58725510 |
| C    | 2.61481116  | -1.62454781 | 0.78663255  |
| C    | 1.51319713  | -2.53344936 | 0.74687210  |
| C    | 0.54905467  | -2.48050287 | 1.72262910  |
| C    | -0.90864513 | -2.90167371 | 1.51636480  |

C -1.62942060 -1.81460625 2.35844600  
C -2.79679506 -1.19446284 1.96770593  
C -2.97762912 0.20834960 2.21372576  
C -3.57797705 0.81302809 1.06247805  
C -3.15270251 2.04419501 0.61159462  
C -3.00318025 2.41447754 -0.89469790  
C -1.69525658 3.20844206 -0.84189543  
C -0.72536620 3.14018355 -1.81099567  
C -0.83996913 2.28359067 -3.07325515  
C 0.62840644 1.80777460 -3.21709269  
C 0.97857497 0.52204692 -3.58713944  
C 2.10024318 -0.11224326 -2.96164677  
C 1.76531640 -1.47199016 -2.67663476  
C 2.14269064 -2.04982869 -1.47835147  
C 1.24282329 -3.03171132 -0.67372462  
C -0.24116226 -2.74785766 -1.01665939  
C -1.26292076 -2.68624773 0.01828579  
C -2.48462688 -2.07787515 -0.28071924  
C -3.54652603 -1.62800275 0.72038386  
C -4.09352340 -0.23357753 0.09948267  
C -3.27953523 -0.06885682 -1.18999058  
C -2.75389717 1.11897702 -1.70609103  
C -1.73287103 1.05483618 -2.74146369  
C -1.30596509 -0.20090340 -3.18322627  
C -0.05972829 -0.49945027 -4.01305997  
C 0.49594570 -1.88760847 -3.38452480  
C -0.51619139 -2.21268040 -2.27927836  
C -1.63016696 -1.35227904 -2.43104023  
C -2.60334139 -1.28606349 -1.44481634  
C 3.30387145 4.57127903 0.52909242  
F 4.48343162 4.28269977 1.12369498  
F 3.56928066 5.06130076 -0.71149058  
F 2.70824919 5.56096134 1.24597346  
C 4.83715201 0.68643968 2.27790142  
F 5.42351596 1.90186440 2.19263991

F 4.76591289 0.35094624 3.59342460  
F 5.65031025 -0.21461338 1.66451617  
C -1.12818902 -4.36700747 2.07764567  
F -0.02518574 -4.79286295 2.75230392  
F -2.15424090 -4.42536674 2.96017683  
F -1.36687008 -5.25434258 1.08344933  
C -4.15697234 3.31626047 -1.48278909  
F -4.86874958 3.90508676 -0.48946940  
F -3.64194274 4.31481629 -2.25041305  
F -5.00893413 2.62269829 -2.27094210  
C -1.32167415 3.17750534 -4.28997280  
F -0.49794469 3.06712683 -5.35984164  
F -2.57733833 2.85588224 -4.68208713  
F -1.32276770 4.49468464 -3.94792187  
C 1.63496436 -4.55600031 -0.79686487  
F 1.60212718 -5.16123631 0.42115760  
F 0.78903786 -5.24682141 -1.59456339  
F 2.89517658 -4.69752241 -1.27777139  
C -4.56584555 -2.77967400 0.98378682  
F -3.90801573 -3.96151399 1.10656446  
F -5.26514870 -2.59198942 2.12668986  
F -5.43645664 -2.93472812 -0.04261445  
C -5.62677529 -0.06915121 -0.14003268  
F -6.35568480 -0.53606809 0.90195254  
F -5.93840932 1.24697431 -0.26271801  
F -6.03919209 -0.68421127 -1.27290845  
C -0.39506377 -0.44877918 -5.53589940  
F -1.06504912 -1.55262855 -5.94639346  
F -1.20667920 0.60827571 -5.79712981  
F 0.71277269 -0.29977366 -6.29777452  
C 0.74985217 -3.09612677 -4.33797531  
F 1.36654478 -2.71705031 -5.48283749  
F 1.57605663 -3.99248358 -3.73931489  
F -0.39165570 -3.75187665 -4.65185866

$^{1809}\text{C}_{60}(\text{CF}_3)_{12}$ 

Atomic Coordinates:

| Atom | x           | y           | z           |
|------|-------------|-------------|-------------|
| C    | 2.74583790  | -1.19022968 | -0.47173423 |
| C    | 2.99522356  | 0.13895497  | -0.54401472 |
| C    | 2.64666480  | 0.90086828  | -1.72373652 |
| C    | 2.26018048  | 0.24597893  | -3.03499011 |
| C    | 1.75622876  | -1.17591175 | -2.75224350 |
| C    | 2.07873341  | -1.84397923 | -1.58956937 |
| C    | 2.45834415  | -1.93526894 | 0.83671776  |
| C    | 1.85272643  | -0.93417630 | 1.86376716  |
| C    | 2.14538186  | 0.48487314  | 1.78396811  |
| C    | 3.06357357  | 1.05050711  | 0.67747129  |
| C    | 2.42488433  | 2.33198534  | 0.08537020  |
| C    | 2.28452432  | 2.17371892  | -1.34949680 |
| C    | 1.38984321  | 3.06907936  | -2.18708822 |
| C    | 0.57678627  | 2.17673027  | -3.15131047 |
| C    | 0.97262916  | 0.91824324  | -3.54983124 |
| C    | -0.02092197 | -0.09907951 | -3.80607012 |
| C    | 0.46802775  | -1.36733020 | -3.34262949 |
| C    | -0.43228276 | -2.31848470 | -2.83118599 |
| C    | -0.04869598 | -3.08122065 | -1.66930451 |
| C    | 1.19768885  | -2.83453645 | -1.04718606 |
| C    | 1.32270849  | -2.88137492 | 0.36847332  |
| C    | 0.21063250  | -3.19563214 | 1.12727343  |
| C    | 0.07293780  | -2.71629102 | 2.56000083  |
| C    | 0.74735583  | -1.34673228 | 2.61515412  |
| C    | -0.21063595 | -0.39382355 | 3.03069263  |
| C    | 0.07768117  | 0.96276407  | 2.95219117  |
| C    | 1.33372084  | 1.39537038  | 2.46170691  |
| C    | 1.27477827  | 2.91097022  | 2.23680441  |
| C    | 1.57532456  | 3.14865094  | 0.77113028  |
| C    | 0.41903505  | 3.71683726  | 0.09533129  |
| C    | 0.27622480  | 3.61696975  | -1.28071063 |
| C    | -0.98704446 | 3.29697344  | -1.81708464 |



C -0.82423888 2.44791452 -2.97095820  
C -1.79827588 1.46822148 -3.23192384  
C -1.39665819 0.16594070 -3.68464065  
C -2.31658550 -0.82278341 -3.17102900  
C -1.84398382 -2.05130404 -2.76295899  
C -2.45418895 -2.86421170 -1.59941866  
C -1.18570582 -3.35182797 -0.88186122  
C -1.06565459 -3.34933501 0.50000786  
C -2.07728581 -2.72412687 1.33810977  
C -1.50728065 -2.38135492 2.69918460  
C -1.53378448 -0.85265738 2.81979370  
C -2.46574061 0.01114463 2.24283320  
C -2.17382302 1.43058365 2.16205401  
C -0.94845148 1.88923195 2.65643589  
C -0.30532540 3.24634177 2.37426049  
C -0.71478609 3.61916310 0.96196709  
C -1.94788432 3.25740186 0.45232669  
C -2.09169561 3.10545317 -0.95422711  
C -3.05241362 2.08414731 -1.24624049  
C -2.95038296 1.32977777 -2.39633260  
C -3.48860007 -0.10551764 -2.47378122  
C -3.61626204 -0.65916339 -1.06856162  
C -3.18114343 -1.90340989 -0.67630147  
C -3.04644162 -1.95391427 0.76699259  
C -3.57122484 -0.62808932 1.37274551  
C -3.74039509 0.19014197 0.09620434  
C -3.49190532 1.51934676 0.02267646  
C -2.96844542 2.35684862 1.19484520  
C 3.43387708 0.18352177 -4.05566382  
F 4.46953561 -0.52728900 -3.53660981  
F 3.03470074 -0.43365788 -5.19826115  
F 3.89619684 1.40791335 -4.38665169  
C 3.76110318 -2.71006746 1.30063097  
F 4.72858469 -2.63212943 0.34709108  
F 4.27193413 -2.19523593 2.44349527

F 3.52571485 -4.03117238 1.48960557  
C 4.57091404 1.21224061 1.13019574  
F 4.69863589 1.26912201 2.47511061  
F 5.31520908 0.15296611 0.71542145  
F 5.12597275 2.32590788 0.59348639  
C 2.14429747 4.25029835 -2.86152588  
F 3.11033099 3.83196719 -3.70609632  
F 1.27867244 5.02324990 -3.56816596  
F 2.72685523 5.03427061 -1.91601273  
C 0.72545983 -3.68572304 3.59511259  
F 2.07571043 -3.53996006 3.57639992  
F 0.33310838 -3.41959452 4.86354848  
F 0.46067252 -4.98273960 3.31634252  
C 2.28471312 3.68748668 3.14063918  
F 2.32373688 3.20123735 4.40310870  
F 3.53865397 3.58207125 2.63255075  
F 2.00453631 5.01177279 3.18867905  
C -3.31383337 -4.08645430 -2.03125554  
F -2.59335135 -4.91192662 -2.83475718  
F -3.69741379 -4.79859019 -0.93868951  
F -4.42766272 -3.72393082 -2.70167664  
C -2.32289992 -3.08242088 3.83184350  
F -2.03086516 -4.40190055 3.92246470  
F -2.12501374 -2.50523891 5.03997716  
F -3.65099997 -3.00390985 3.56389012  
C -0.75662822 4.29383297 3.44025961  
F -0.55597005 5.56523820 3.02398629  
F -2.08517606 4.15863148 3.68718361  
F -0.13058285 4.11612924 4.62809215  
C -4.83358799 -0.10972658 -3.25735519  
F -4.66151136 0.42436638 -4.49471680  
F -5.33923689 -1.35209170 -3.41015523  
F -5.75936632 0.64013607 -2.60331724  
C -4.96643525 -0.74395843 2.10973304  
F -4.84048268 -0.70209535 3.45532229

|   |             |             |            |
|---|-------------|-------------|------------|
| F | -5.78095298 | 0.28850354  | 1.76520067 |
| F | -5.60579287 | -1.88910282 | 1.76862019 |
| C | -4.16636597 | 3.17313083  | 1.83634758 |
| F | -3.90821939 | 4.50265503  | 1.88192912 |
| F | -5.29437807 | 3.03335905  | 1.08836275 |
| F | -4.45155501 | 2.74618391  | 3.08873805 |

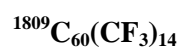

Atomic Coordinates:

| Atom | x           | y           | z           |
|------|-------------|-------------|-------------|
| C    | 2.48738653  | 0.25632527  | 3.18471574  |
| C    | 2.49770162  | -1.13222968 | 2.86439982  |
| C    | 1.40091302  | -1.92342408 | 3.23143736  |
| C    | 0.26881365  | -1.36262348 | 3.90717213  |
| C    | 0.25777154  | -0.03024732 | 4.21254034  |
| C    | 1.37932475  | 0.78772216  | 3.85668912  |
| C    | 3.16711433  | 0.98538947  | 2.14613732  |
| C    | 3.92459161  | -0.01537470 | 1.24017068  |
| C    | 3.18011168  | -1.31912552 | 1.61218886  |
| C    | 2.73614115  | -2.29062585 | 0.75627439  |
| C    | 1.60630876  | -3.10992166 | 1.12162260  |
| C    | 0.94940025  | -2.95209437 | 2.35137005  |
| C    | -0.47608128 | -3.09882971 | 2.47952854  |
| C    | -0.99668642 | -2.17768957 | 3.62497186  |
| C    | -2.07363910 | -1.22181934 | 3.04784880  |
| C    | -2.08630954 | 0.19550338  | 3.37762287  |
| C    | -1.01405110 | 0.81645972  | 4.32002928  |
| C    | -0.51451261 | 2.14742841  | 3.69425057  |
| C    | 0.91195855  | 2.09320175  | 3.51853249  |
| C    | 1.56175072  | 2.78508325  | 2.48725691  |
| C    | 2.70076178  | 2.22652184  | 1.80257177  |
| C    | 2.77284296  | 2.80234430  | 0.37767350  |
| C    | 2.90847097  | 1.62240103  | -0.55272201 |
| C    | 3.75211509  | 0.34561424  | -0.31076301 |
| C    | 2.93382514  | -0.70818096 | -1.10135733 |

C 2.81360309 -2.17828345 -0.77722269  
C 1.38668991 -2.64416785 -1.14922286  
C 0.81709360 -3.34284338 -0.05058567  
C -0.57796855 -3.47322552 0.07242447  
C -1.20640778 -3.42345718 1.36402926  
C -2.66025581 -3.02764374 1.23753600  
C -2.80144367 -1.67243527 1.94331253  
C -3.27055689 -0.72867091 0.99723710  
C -3.28085780 0.62354986 1.30635346  
C -2.82132558 1.06473507 2.56830234  
C -2.71321451 2.58873076 2.53674410  
C -1.26416388 2.91861220 2.84250867  
C -0.63599140 3.53586878 1.70240064  
C 0.76088874 3.49464597 1.53454774  
C 1.33352770 3.36034865 0.24159947  
C 0.48660587 3.12146916 -0.82652567  
C 0.91849349 2.27710239 -2.01184509  
C 2.02754730 1.36754222 -1.54886541  
C 2.04353976 -0.05270210 -1.88805685  
C 0.93919666 -0.68393777 -2.69928518  
C 0.53501405 -1.97095016 -2.00222744  
C -0.87993382 -2.05676432 -1.86635823  
C -1.42934000 -2.88157168 -0.89931694  
C -2.81904651 -2.65682639 -0.33490842  
C -3.02058630 -1.14639716 -0.33045701  
C -2.48253447 -0.23664071 -1.24350427  
C -2.48962508 1.16922845 -0.91575457  
C -3.04352221 1.58696125 0.29584885  
C -2.86109690 2.95112582 0.96140605  
C -1.47672811 3.41470890 0.56749030  
C -0.92733182 3.11235233 -0.66847803  
C -1.60351999 2.16985676 -1.69229336  
C -0.35938790 1.44882688 -2.24102779  
C -0.34916963 0.13974853 -2.53313490  
C -1.57281645 -0.77456860 -2.37507068

C 5.38320839 -0.16730988 1.82733330  
F 6.01603202 -1.26159612 1.35092327  
F 6.15485836 0.91608685 1.60076366  
F 5.30953473 -0.32159012 3.18097526  
C -1.45775376 -2.92858874 4.93532090  
F -0.98380356 -4.19932443 4.95937229  
F -0.97632153 -2.30158290 6.04230959  
F -2.80259225 -2.96683870 5.06695329  
C -1.43266081 0.96679236 5.84105619  
F -2.57892464 0.30036076 6.11342191  
F -0.46376862 0.46758049 6.65617834  
F -1.59434602 2.26326901 6.19821321  
C 3.84248760 3.94340066 0.29209529  
F 4.16541759 4.24379871 -0.98309744  
F 3.36745186 5.07604062 0.88133361  
F 4.97768420 3.60367900 0.95040229  
C 5.07072048 0.59693138 -1.18263186  
F 5.71060001 1.72972886 -0.81722207  
F 5.94792916 -0.42401741 -1.10124919  
F 4.74961061 0.74021635 -2.49304607  
C 3.88286650 -3.15405209 -1.35992802  
F 5.09664750 -2.95580716 -0.79701706  
F 3.52621407 -4.44384262 -1.10437449  
F 4.00897453 -3.01847119 -2.69823386  
C -3.59687372 -4.11259735 1.85500054  
F -3.71473877 -5.19875669 1.05529384  
F -3.07654292 -4.55765700 3.02768699  
F -4.83247045 -3.63034621 2.12378970  
C -3.71497260 3.22273683 3.55197216  
F -3.70650480 2.51466100 4.71110723  
F -3.38987566 4.49861020 3.86228478  
F -4.99043240 3.19208579 3.09775812  
C 1.38821739 3.15226714 -3.22672146  
F 2.18475889 2.45128779 -4.06747419  
F 0.34146204 3.62567858 -3.93976103

|   |             |             |             |
|---|-------------|-------------|-------------|
| F | 2.10081664  | 4.21915084  | -2.78682195 |
| C | 1.33784151  | -0.93600558 | -4.20037258 |
| F | 0.58206683  | -1.93301666 | -4.73115444 |
| F | 1.16323816  | 0.16517444  | -4.96192605 |
| F | 2.63321057  | -1.31134288 | -4.30089757 |
| C | -3.93532660 | -3.37321098 | -1.15491430 |
| F | -4.17036401 | -2.69846073 | -2.30765687 |
| F | -3.58391677 | -4.63467328 | -1.49676575 |
| F | -5.11280672 | -3.41102545 | -0.48655434 |
| C | -3.95251737 | 3.98257295  | 0.53704106  |
| F | -3.98691513 | 5.05134940  | 1.36898939  |
| F | -3.67619276 | 4.47152655  | -0.69775237 |
| F | -5.18623670 | 3.42954953  | 0.48280354  |
| C | -2.42647703 | 2.88284926  | -2.84987362 |
| F | -2.15056712 | 4.20540025  | -2.91629188 |
| F | -2.13673494 | 2.33933909  | -4.05720654 |
| F | -3.76344824 | 2.73820690  | -2.67354281 |
| C | -2.32435493 | -0.94371968 | -3.76931498 |
| F | -3.58683190 | -0.45431770 | -3.71380037 |
| F | -1.68264498 | -0.27340208 | -4.75878847 |
| F | -2.38151512 | -2.24074635 | -4.15044470 |

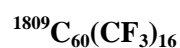

Atomic Coordinates:

| Atom | x           | y           | z          |
|------|-------------|-------------|------------|
| C    | -2.45433128 | -0.58681552 | 2.80828303 |
| C    | -2.23774867 | 0.77418922  | 2.94081774 |
| C    | -0.95651216 | 1.23265740  | 3.34965433 |
| C    | 0.08305278  | 0.33427554  | 3.64193241 |
| C    | -0.16719835 | -1.05623542 | 3.51707269 |
| C    | -1.42813276 | -1.50139241 | 3.13842438 |
| C    | -3.45331343 | -1.18737870 | 1.82121515 |
| C    | -3.52716118 | -0.21608708 | 0.61051975 |
| C    | -3.28524459 | 1.18556724  | 0.72435882 |
| C    | -2.92893157 | 1.83784482  | 2.08147557 |

C -1.75914361 2.83792168 1.87581357  
C -0.65057336 2.46003204 2.68746680  
C 0.68069204 2.69814282 2.27217692  
C 1.73687508 1.78337662 2.59612693  
C 1.44489727 0.63057007 3.28023836  
C 2.21371744 -0.68409578 3.09308870  
C 1.05828579 -1.69609266 3.05007263  
C 0.95064893 -2.70812786 2.15595213  
C -0.34485855 -3.21175105 1.74141331  
C -1.62834807 -2.84632328 2.45820167  
C -2.70902431 -2.49659536 1.42523181  
C -2.68879570 -2.98587391 0.17682633  
C -3.41922675 -2.26736817 -0.93987607  
C -3.50100755 -0.78132561 -0.66825187  
C -3.07218879 -0.06977807 -1.80468947  
C -2.84051107 1.28265599 -1.69959738  
C -3.03829144 1.92015886 -0.45628958  
C -2.41851543 3.30771016 -0.49909627  
C -1.50120113 3.47043786 0.68773065  
C -0.15243545 3.63222747 0.22109445  
C 0.93200790 3.31771308 1.02695938  
C 2.34137989 3.00394974 0.49443602  
C 2.93137427 1.94263302 1.62569444  
C 3.18368311 0.54159139 1.06886724  
C 2.83741974 -0.60404141 1.71548744  
C 2.68680964 -1.69653854 0.74192851  
C 1.95566816 -2.97402456 1.04247222  
C 1.01551772 -3.31188491 -0.12451577  
C -0.29636385 -3.60215993 0.43463624  
C -1.51125887 -3.79418780 -0.42192377  
C -1.28895401 -3.00481593 -1.71970741  
C -2.34626554 -2.24381119 -2.01991630  
C -2.34295753 -0.95637808 -2.82171310  
C -0.90608530 -0.39889244 -2.90883110  
C -0.67015551 1.01319249 -2.80875204

C -1.84247558 2.01220709 -2.60866982  
C -1.42429715 3.10486537 -1.63990031  
C -0.16672950 3.36207764 -1.21920147  
C 1.03241399 2.78482414 -1.89593241  
C 2.12197484 2.34560456 -0.87099181  
C 2.52348122 1.09828442 -1.20994706  
C 3.41003782 0.20682061 -0.40547137  
C 2.92241106 -1.25088256 -0.50817836  
C 2.34412824 -1.90651657 -1.75114216  
C 1.22002097 -2.89601105 -1.39167533  
C 0.04591616 -2.78003413 -2.38894585  
C 0.16776993 -1.28753883 -2.74245418  
C 1.46476959 -0.84024568 -2.42290926  
C 1.65071753 0.51708137 -2.22891410  
C 0.62059246 1.43094594 -2.50014333  
C -4.86904578 -1.48514822 2.47933554  
F -4.86832799 -1.18391462 3.80101007  
F -5.85147716 -0.76315417 1.88643970  
F -5.20049825 -2.79371191 2.37409681  
C -4.14636771 2.45691613 2.83341636  
F -3.71516304 3.25587609 3.84484258  
F -4.93270211 3.19326868 2.01888252  
F -4.92498958 1.49072807 3.37791316  
C 3.21639630 -1.01921361 4.27171692  
F 2.75531859 -2.06855470 5.00390346  
F 4.44224056 -1.35348820 3.80887200  
F 3.35183409 0.02538675 5.12412943  
C -2.02640155 -3.93859128 3.49712362  
F -1.00999480 -4.12185297 4.38245895  
F -3.12375843 -3.57036342 4.20104782  
F -2.28234863 -5.12572355 2.90658540  
C -4.80237283 -2.85624464 -1.33795992  
F -5.39595517 -2.09221995 -2.29165162  
F -4.69504471 -4.11509544 -1.81623156  
F -5.63496674 -2.88393925 -0.26915384



C -3.35728714 4.52449898 -0.74913936  
F -2.62854906 5.57410119 -1.21334363  
F -4.30406318 4.23011591 -1.67381975  
F -3.98342175 4.93934750 0.37385686  
C 3.10384697 4.36630931 0.32144365  
F 3.38751755 4.96587363 1.49885404  
F 4.24309584 4.23325250 -0.39031591  
F 2.30350821 5.23155558 -0.35925192  
C 4.17206374 2.42077843 2.48290504  
F 3.80842701 3.31680121 3.43372250  
F 4.69659474 1.35195308 3.13844900  
F 5.16828512 2.95500699 1.74992590  
C 2.91142500 -4.15594788 1.36314704  
F 3.68597498 -3.86482468 2.43845535  
F 2.21544561 -5.28528234 1.64197183  
F 3.72860643 -4.41478292 0.31429174  
C -1.77685390 -5.32502348 -0.67253635  
F -2.55559186 -5.85150228 0.29848833  
F -2.38470809 -5.53875189 -1.86082934  
F -0.60330997 -6.01159821 -0.68678069  
C -3.02607068 -1.12446787 -4.23643583  
F -2.11791889 -1.01558163 -5.23605268  
F -3.61020632 -2.34222360 -4.35677682  
F -3.98581118 -0.19013754 -4.43673993  
C -2.42507540 2.58009149 -3.95999453  
F -2.01717907 1.85093220 -5.02754587  
F -3.77885871 2.58806424 -3.95104136  
F -2.01325164 3.85703292 -4.15886600  
C 1.58154994 3.67971099 -3.07543098  
F 1.57747231 4.99618795 -2.79050221  
F 2.84381946 3.31575020 -3.40614549  
F 0.80385983 3.51229089 -4.17907896  
C 4.89943300 0.36361359 -0.84674145  
F 5.34743076 1.61762151 -0.60334401  
F 5.70432374 -0.50102941 -0.19327236

|   |             |             |             |
|---|-------------|-------------|-------------|
| F | 5.02073878  | 0.14721191  | -2.18210605 |
| C | 3.47113283  | -2.56332166 | -2.65529938 |
| F | 4.66756974  | -2.56286864 | -2.01616426 |
| F | 3.18908240  | -3.85928956 | -2.93590741 |
| F | 3.62344013  | -1.89846452 | -3.82517373 |
| C | 0.16482012  | -3.69322027 | -3.65832739 |
| F | 0.43212848  | -4.97288629 | -3.30989717 |
| F | -0.99687906 | -3.68428767 | -4.36031738 |
| F | 1.13473558  | -3.26149476 | -4.49842915 |

<sup>1809</sup>C<sub>60</sub>(CF<sub>3</sub>)<sub>16</sub> (hypothetic)

Atomic Coordinates:

| Atom | x           | y           | z           |
|------|-------------|-------------|-------------|
| C    | -1.45119049 | 2.78531248  | 1.34347276  |
| C    | -0.21926856 | 2.83508691  | 1.86294936  |
| C    | 0.22176509  | 1.96215522  | 3.05188438  |
| C    | -0.66329407 | 0.74406566  | 3.14794521  |
| C    | -1.92006734 | 0.69330855  | 2.62129519  |
| C    | -2.54894109 | 1.85073867  | 1.88413218  |
| C    | -1.78795594 | 3.27656171  | -0.07580608 |
| C    | -0.53983837 | 3.16494207  | -0.99018251 |
| C    | 0.78981032  | 3.22019302  | -0.42924292 |
| C    | 0.99634671  | 3.38941627  | 1.09887505  |
| C    | 2.07631675  | 2.37046735  | 1.53638687  |
| C    | 1.59722124  | 1.53701407  | 2.57606151  |
| C    | 2.03917071  | 0.23178850  | 2.72645146  |
| C    | 1.16302593  | -0.86203326 | 3.15069916  |
| C    | -0.15483959 | -0.60421707 | 3.32759679  |
| C    | -1.32119001 | -1.59463773 | 3.18232342  |
| C    | -2.31285030 | -0.69308497 | 2.42700940  |
| C    | -3.07773542 | -1.03094782 | 1.36125365  |
| C    | -3.45935625 | 0.01054256  | 0.40756639  |
| C    | -3.13550365 | 1.34646556  | 0.58027100  |
| C    | -2.78350790 | 2.17551325  | -0.51245381 |
| C    | -2.85717544 | 1.66810777  | -1.80018807 |

C -2.02458730 2.22810125 -2.93150809  
C -0.71160961 2.67035085 -2.28848884  
C 0.34341174 1.94915202 -2.89462014  
C 1.61854848 2.00098311 -2.35544155  
C 1.87176574 2.77713147 -1.19941555  
C 3.27533558 2.44166380 -0.69617520  
C 3.08248243 1.90538142 0.70398410  
C 3.48275203 0.54083906 0.77993824  
C 2.97821399 -0.29198729 1.79791702  
C 2.69323369 -1.66275114 1.54459666  
C 1.71016260 -2.19527710 2.61110514  
C 0.57050283 -2.88185400 1.89511424  
C -0.91494280 -2.88680952 2.33365161  
C -1.63384471 -2.96125095 0.96553650  
C -2.98843322 -2.38336615 0.63432636  
C -2.94321720 -1.89163545 -0.83312444  
C -3.41385714 -0.55091536 -0.89684509  
C -3.09363579 0.27590304 -1.99122317  
C -2.26750813 -0.22639968 -3.03384460  
C -1.61138811 0.90953173 -3.78747888  
C -0.11415685 0.76395426 -3.52029307  
C 0.58517956 -0.42609189 -3.30956153  
C 1.91777329 -0.37351280 -2.75417448  
C 2.46333149 0.86820242 -2.42891431  
C 3.68699525 1.12590640 -1.55538676  
C 3.68982719 0.01278129 -0.52631911  
C 3.22777325 -1.25923376 -0.81175788  
C 2.76663369 -2.10592438 0.24121998  
C 1.85473927 -3.19780712 -0.29222393  
C 0.62843576 -3.23756681 0.58623661  
C -0.71649151 -3.28249806 0.02120435  
C -0.94703735 -3.31187133 -1.46841766  
C -2.03255102 -2.30015959 -1.78807382  
C -1.65585563 -1.45692483 -2.87581948  
C -0.20987766 -1.75350618 -3.33971378

C 0.25226434 -2.66495242 -2.18798686  
C 1.48505399 -2.60383081 -1.66146984  
C 2.57648722 -1.64345124 -2.15892597  
C 0.34854284 2.67277066 4.44103573  
F 0.72847760 1.75890705 5.37595009  
F 1.29479835 3.64192999 4.41242807  
F -0.80857226 3.22836281 4.84764241  
C -3.68112830 2.51499961 2.73811832  
F -3.20481707 3.16348193 3.81750764  
F -4.39915671 3.39533796 1.99921329  
F -4.53960768 1.55084368 3.16990008  
C -2.38494072 4.75129365 -0.00394262  
F -1.64754561 5.62444962 -0.73068906  
F -3.66325326 4.79767401 -0.44255505  
F -2.38463045 5.21170538 1.27455451  
C 1.25525245 4.89984952 1.53453157  
F 0.28269793 5.33071881 2.38086275  
F 2.43477368 5.04234573 2.17969676  
F 1.24156278 5.73756464 0.47049661  
C -1.89480571 -1.80091573 4.64485748  
F -2.33440821 -0.60997183 5.13902739  
F -2.94537746 -2.64646972 4.67317232  
F -0.94955270 -2.24772520 5.49955682  
C -2.73873582 3.40165420 -3.66830903  
F -4.03853630 3.11899546 -3.92067083  
F -2.72011478 4.51234143 -2.89013433  
F -2.12676063 3.73280487 -4.82881101  
C 4.23007252 3.67321888 -0.71310592  
F 3.61050493 4.73909021 -0.14924542  
F 5.35388702 3.44194772 0.00752342  
F 4.58414353 4.04795544 -1.96315913  
C 2.47200562 -2.98496874 3.71940938  
F 3.54234547 -2.26126215 4.15232447  
F 1.68511529 -3.22111538 4.79276114  
F 2.93319743 -4.16998315 3.26199638

C -1.17065194 -4.33300954 2.96991635  
F -0.62583781 -4.46512253 4.19610696  
F -2.48874193 -4.61757311 3.06272136  
F -0.62189157 -5.29510939 2.18604685  
C -4.26463035 -3.24707734 0.92114677  
F -4.09410790 -4.54328160 0.59163425  
F -4.61271646 -3.18422991 2.22951191  
F -5.32037917 -2.76771846 0.20534414  
C -1.93911041 0.88173571 -5.31150644  
F -1.07685451 1.64083050 -6.02789403  
F -1.84392445 -0.38595837 -5.78236803  
F -3.20290081 1.29101075 -5.57144322  
C 4.97777978 1.18587589 -2.42469277  
F 4.81528789 1.98245090 -3.50862643  
F 6.05324067 1.61387847 -1.72476166  
F 5.27904393 -0.05046084 -2.88916554  
C 2.59417539 -4.58384330 -0.39157048  
F 2.54811928 -5.24420646 0.78728238  
F 2.05005241 -5.37934881 -1.33695242  
F 3.90227075 -4.40241585 -0.70939888  
C -1.33512174 -4.75419079 -1.94329494  
F -2.62199338 -5.02178556 -1.61014365  
F -1.22676049 -4.88686217 -3.28468973  
F -0.56035974 -5.69826394 -1.36254617  
C -0.07745052 -2.47930854 -4.75124608  
F -1.27700665 -2.90582839 -5.20785079  
F 0.46416365 -1.65591512 -5.68342269  
F 0.73600510 -3.55872308 -4.67261517  
C 3.55488429 -2.39160896 -3.17327406  
F 3.10365624 -3.63832280 -3.45762852  
F 3.65165340 -1.72275519 -4.34805683  
F 4.79652960 -2.53865153 -2.65937081

## References

- S1 V. A. Brotsman, N. B. Tamm, V. Yu. Markov, I. N. Ioffe, A. A. Goryunkov, E. Kemnitz and S. I. Troyanov, *Inorg. Chem.* **2018**, *57*, 8325–8331.
- S2 N. A. Romanova, N. B. Tamm, V. Yu. Markov, A. A. Goryunkov, L. N. Sidorov and S. I. Troyanov, *Mendeleev Commun.* **2012**, *22*, 297-298.
- S3 M. P. Kosaya, A. V. Rybalchenko, N. S. Lukonina, O. N. Mazaleva, I. N. Ioffe, V. Yu. Markov, S. I. Troyanov, L. N. Sidorov, N. B. Tamm and A. A. Goryunkov, *Chem. – Asian J.* **2018**, *13*, 1920-1931.
- S4 J. P. Perdew, K. Burke and M. Ernzerhof, *Phys. Rev. Lett.* **1996**, *77*, 3865-3868.
- S5 D. N. Laikov, *Chem. Phys. Lett.* **2005**, *416*, 116-120.
- S6 D. N. Laikov, *Chem. Phys. Lett.* **1997**, *281*, 151-156.
